# Supplementary material
Source: PubMed Central journal article supplement (PMC3945687)
Supplement: SD1.pdf [file SD1.pdf]

SUPPLEMENTAL TABLE 1  
Continued

| Gene | Accession  | Gene ID | Gene Name | Gene Type      | Gene Class | Gene Description | Gene Structure |         | Gene Expression |      | Gene Localization |      | Gene Function |      |
|------|------------|---------|-----------|----------------|------------|------------------|----------------|---------|-----------------|------|-------------------|------|---------------|------|
|      |            |         |           |                |            |                  | Exons          | Introns | Log2            | FPKM | Log2              | FPKM | Log2          | FPKM |
| 1    | U000000001 | 1       | ACT1      | protein-coding | actin      | actin            | 1              | 0.000   | 0.000           | 0    | 0.00              | 1    | 0.00          | 1    |
| 2    | U000000002 | 2       | ACT2      | protein-coding | actin      | actin            | 1              | 0.000   | 0.000           | 0    | 0.00              | 1    | 0.00          | 1    |
| 3    | U000000003 | 3       | ACT3      | protein-coding | actin      | actin            | 1              | 0.000   | 0.000           | 0    | 0.00              | 1    | 0.00          | 1    |
| 4    | U000000004 | 4       | ACT4      | protein-coding | actin      | actin            | 1              | 0.000   | 0.000           | 0    | 0.00              | 1    | 0.00          | 1    |
| 5    | U000000005 | 5       | ACT5      | protein-coding | actin      | actin            | 1              | 0.000   | 0.000           | 0    | 0.00              | 1    | 0.00          | 1    |
| 6    | U000000006 | 6       | ACT6      | protein-coding | actin      | actin            | 1              | 0.000   | 0.000           | 0    | 0.00              | 1    | 0.00          | 1    |
| 7    | U000000007 | 7       | ACT7      | protein-coding | actin      | actin            | 1              | 0.000   | 0.000           | 0    | 0.00              | 1    | 0.00          | 1    |
| 8    | U000000008 | 8       | ACT8      | protein-coding | actin      | actin            | 1              | 0.000   | 0.000           | 0    | 0.00              | 1    | 0.00          | 1    |
| 9    | U000000009 | 9       | ACT9      | protein-coding | actin      | actin            | 1              | 0.000   | 0.000           | 0    | 0.00              | 1    | 0.00          | 1    |
| 10   | U000000010 | 10      | ACT10     | protein-coding | actin      | actin            | 1              | 0.000   | 0.000           | 0    | 0.00              | 1    | 0.00          | 1    |
| 11   | U000000011 | 11      | ACT11     | protein-coding | actin      | actin            | 1              | 0.000   | 0.000           | 0    | 0.00              | 1    | 0.00          | 1    |
| 12   | U000000012 | 12      | ACT12     | protein-coding | actin      | actin            | 1              | 0.000   | 0.000           | 0    | 0.00              | 1    | 0.00          | 1    |
| 13   | U000000013 | 13      | ACT13     | protein-coding | actin      | actin            | 1              | 0.000   | 0.000           | 0    | 0.00              | 1    | 0.00          | 1    |
| 14   | U000000014 | 14      | ACT14     | protein-coding | actin      | actin            | 1              | 0.000   | 0.000           | 0    | 0.00              | 1    | 0.00          | 1    |
| 15   | U000000015 | 15      | ACT15     | protein-coding | actin      | actin            | 1              | 0.000   | 0.000           | 0    | 0.00              | 1    | 0.00          | 1    |
| 16   | U000000016 | 16      | ACT16     | protein-coding | actin      | actin            | 1              | 0.000   | 0.000           | 0    | 0.00              | 1    | 0.00          | 1    |
| 17   | U000000017 | 17      | ACT17     | protein-coding | actin      | actin            | 1              | 0.000   | 0.000           | 0    | 0.00              | 1    | 0.00          | 1    |
| 18   | U000000018 | 18      | ACT18     | protein-coding | actin      | actin            | 1              | 0.000   | 0.000           | 0    | 0.00              | 1    | 0.00          | 1    |
| 19   | U000000019 | 19      | ACT19     | protein-coding | actin      | actin            | 1              | 0.000   | 0.000           | 0    | 0.00              | 1    | 0.00          | 1    |
| 20   | U000000020 | 20      | ACT20     | protein-coding | actin      | actin            | 1              | 0.000   | 0.000           | 0    | 0.00              | 1    | 0.00          | 1    |
| 21   | U000000021 | 21      | ACT21     | protein-coding | actin      | actin            | 1              | 0.000   | 0.000           | 0    | 0.00              | 1    | 0.00          | 1    |
| 22   | U000000022 | 22      | ACT22     | protein-coding | actin      | actin            | 1              | 0.000   | 0.000           | 0    | 0.00              | 1    | 0.00          | 1    |
| 23   | U000000023 | 23      | ACT23     | protein-coding | actin      | actin            | 1              | 0.000   | 0.000           | 0    | 0.00              | 1    | 0.00          | 1    |
| 24   | U000000024 | 24      | ACT24     | protein-coding | actin      | actin            | 1              | 0.000   | 0.000           | 0    | 0.00              | 1    | 0.00          | 1    |
| 25   | U000000025 | 25      | ACT25     | protein-coding | actin      | actin            | 1              | 0.000   | 0.000           | 0    | 0.00              | 1    | 0.00          | 1    |
| 26   | U000000026 | 26      | ACT26     | protein-coding | actin      | actin            | 1              | 0.000   | 0.000           | 0    | 0.00              | 1    | 0.00          | 1    |
| 27   | U000000027 | 27      | ACT27     | protein-coding | actin      | actin            | 1              | 0.000   | 0.000           | 0    | 0.00              | 1    | 0.00          | 1    |
| 28   | U000000028 | 28      | ACT28     | protein-coding | actin      | actin            | 1              | 0.000   | 0.000           | 0    | 0.00              | 1    | 0.00          | 1    |
| 29   | U000000029 | 29      | ACT29     | protein-coding | actin      | actin            | 1              | 0.000   | 0.000           | 0    | 0.00              | 1    | 0.00          | 1    |
| 30   | U000000030 | 30      | ACT30     | protein-coding | actin      | actin            | 1              | 0.000   | 0.000           | 0    | 0.00              | 1    | 0.00          | 1    |
| 31   | U000000031 | 31      | ACT31     | protein-coding | actin      | actin            | 1              | 0.000   | 0.000           | 0    | 0.00              | 1    | 0.00          | 1    |
| 32   | U000000032 | 32      | ACT32     | protein-coding | actin      | actin            | 1              | 0.000   | 0.000           | 0    | 0.00              | 1    | 0.00          | 1    |
| 33   | U000000033 | 33      | ACT33     | protein-coding | actin      | actin            | 1              | 0.000   | 0.000           | 0    | 0.00              | 1    | 0.00          | 1    |
| 34   | U000000034 | 34      | ACT34     | protein-coding | actin      | actin            | 1              | 0.000   | 0.000           | 0    | 0.00              | 1    | 0.00          | 1    |
| 35   | U000000035 | 35      | ACT35     | protein-coding | actin      | actin            | 1              | 0.000   | 0.000           | 0    | 0.00              | 1    | 0.00          | 1    |
| 36   | U000000036 | 36      | ACT36     | protein-coding | actin      | actin            | 1              | 0.000   | 0.000           | 0    | 0.00              | 1    | 0.00          | 1    |
| 37   | U000000037 | 37      | ACT37     | protein-coding | actin      | actin            | 1              | 0.000   | 0.000           | 0    | 0.00              | 1    | 0.00          | 1    |
| 38   | U000000038 | 38      | ACT38     | protein-coding | actin      | actin            | 1              | 0.000   | 0.000           | 0    | 0.00              | 1    | 0.00          | 1    |
| 39   | U000000039 | 39      | ACT39     | protein-coding | actin      | actin            | 1              | 0.000   | 0.000           | 0    | 0.00              | 1    | 0.00          | 1    |
| 40   | U000000040 | 40      | ACT40     | protein-coding | actin      | actin            | 1              | 0.000   | 0.000           | 0    | 0.00              | 1    | 0.00          | 1    |
| 41   | U000000041 | 41      | ACT41     | protein-coding | actin      | actin            | 1              | 0.000   | 0.000           | 0    | 0.00              | 1    | 0.00          | 1    |
| 42   | U000000042 | 42      | ACT42     | protein-coding | actin      | actin            | 1              | 0.000   | 0.000           | 0    | 0.00              | 1    | 0.00          | 1    |
| 43   | U000000043 | 43      | ACT43     | protein-coding | actin      | actin            | 1              | 0.000   | 0.000           | 0    | 0.00              | 1    | 0.00          | 1    |
| 44   | U000000044 | 44      | ACT44     | protein-coding | actin      | actin            | 1              | 0.000   | 0.000           | 0    | 0.00              | 1    | 0.00          | 1    |
| 45   | U000000045 | 45      | ACT45     | protein-coding | actin      | actin            | 1              | 0.000   | 0.000           | 0    | 0.00              | 1    | 0.00          | 1    |
| 46   | U000000046 | 46      | ACT46     | protein-coding | actin      | actin            | 1              | 0.000   | 0.000           | 0    | 0.00              | 1    | 0.00          | 1    |
| 47   | U000000047 | 47      | ACT47     | protein-coding | actin      | actin            | 1              | 0.000   | 0.000           | 0    | 0.00              | 1    | 0.00          | 1    |
| 48   | U000000048 | 48      | ACT48     | protein-coding | actin      | actin            | 1              | 0.000   | 0.000           | 0    | 0.00              | 1    | 0.00          | 1    |
| 49   | U000000049 | 49      | ACT49     | protein-coding | actin      | actin            | 1              | 0.000   | 0.000           | 0    | 0.00              | 1    | 0.00          | 1    |
| 50   | U000000050 | 50      | ACT50     | protein-coding | actin      | actin            | 1              | 0.000   | 0.000           | 0    | 0.00              | 1    | 0.00          | 1    |
